# Supplementary material for: Detoxifying effects of ultrafiltration fractions of Dendrobium aphyllum peptides on chemical and AAPH-induced oxidative stress
Source: Royal Society of Chemistry journal article supplement (doi:10.1039/c7ra08957k), 2017-01-01
Supplement: c7ra08957k1.pdf [file c7ra08957k1.pdf]

### DYDD:

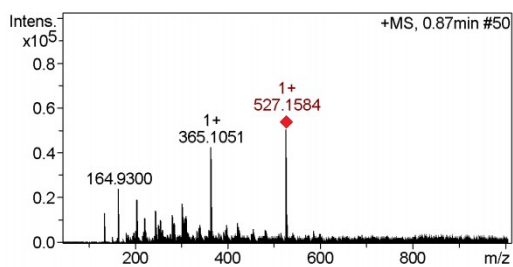

| #  | m/z      | I     | I%    |
|----|----------|-------|-------|
| 1  | 135.0044 | 13004 | 25.7  |
| 2  | 164.9300 | 24364 | 48.2  |
| 3  | 205.0677 | 19210 | 38.0  |
| 4  | 244.8700 | 14668 | 29.0  |
| 5  | 280.8466 | 12500 | 24.7  |
| 6  | 302.8285 | 17404 | 34.4  |
| 7  | 304.8258 | 11642 | 23.0  |
| 8  | 310.8750 | 11848 | 23.4  |
| 9  | 365.1051 | 42678 | 84.5  |
| 10 | 527.1584 | 50536 | 100.0 |

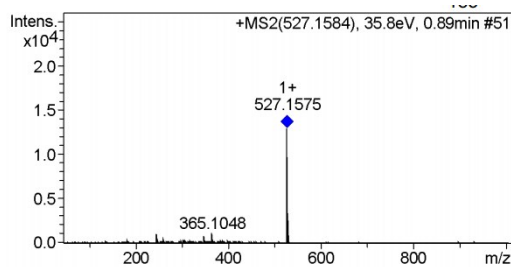

| #  | m/z      | I     | I%    |
|----|----------|-------|-------|
| 1  | 180.9018 | 380   | 2.9   |
| 2  | 244.8686 | 1016  | 7.9   |
| 3  | 246.8645 | 350   | 2.7   |
| 4  | 260.8457 | 360   | 2.8   |
| 5  | 306.8695 | 300   | 2.3   |
| 6  | 347.0933 | 748   | 5.8   |
| 7  | 365.1048 | 1124  | 8.7   |
| 8  | 527.1575 | 12922 | 100.0 |
| 9  | 528.1606 | 3356  | 26.0  |
| 10 | 529.1616 | 488   | 3.8   |

### DDDY:

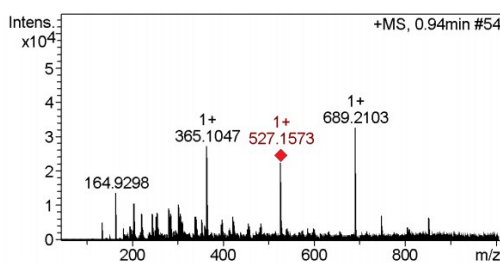

| #  | m/z      | I     | I%    |
|----|----------|-------|-------|
| 1  | 164.9298 | 13868 | 42.4  |
| 2  | 205.0673 | 10722 | 32.8  |
| 3  | 222.8877 | 7778  | 23.8  |
| 4  | 256.8198 | 7964  | 24.4  |
| 5  | 280.8459 | 9254  | 28.3  |
| 6  | 302.8285 | 10580 | 32.4  |
| 7  | 365.1047 | 27350 | 83.6  |
| 8  | 527.1573 | 22536 | 68.9  |
| 9  | 689.2103 | 32696 | 100.0 |
| 10 | 690.2118 | 8672  | 26.5  |

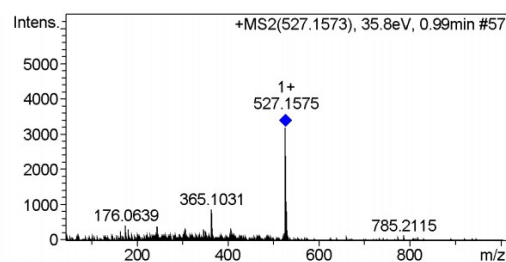

| #  | m/z      | I    | I%    |
|----|----------|------|-------|
| 1  | 176.0639 | 426  | 13.4  |
| 2  | 244.8694 | 402  | 12.6  |
| 3  | 306.8746 | 342  | 10.7  |
| 4  | 347.0887 | 318  | 10.0  |
| 5  | 365.1031 | 884  | 27.7  |
| 6  | 407.1165 | 348  | 10.9  |
| 7  | 527.1575 | 3188 | 100.0 |
| 8  | 528.1578 | 1098 | 34.4  |
| 9  | 528.2055 | 274  | 8.6   |
| 10 | 529.1656 | 478  | 15.0  |

### NGAQ:

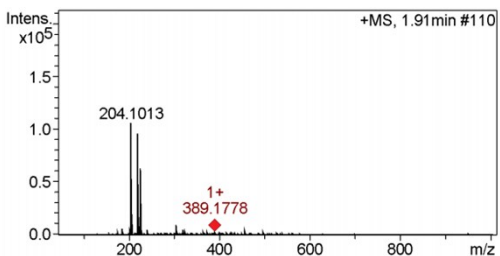

| #  | m/z      | I      | I%    |
|----|----------|--------|-------|
| 1  | 186.0909 | 6102   | 5.8   |
| 2  | 204.1013 | 105682 | 100.0 |
| 3  | 205.1048 | 16292  | 15.4  |
| 4  | 206.1166 | 19742  | 18.7  |
| 5  | 220.1326 | 95484  | 90.4  |
| 6  | 221.1357 | 16402  | 15.5  |
| 7  | 226.0832 | 62604  | 59.2  |
| 8  | 227.0864 | 8154   | 7.7   |
| 9  | 305.1561 | 9764   | 9.2   |
| 10 | 320.0706 | 4820   | 4.6   |

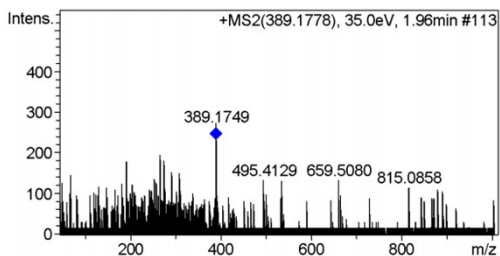

| #  | m/z      | I   | I%    |
|----|----------|-----|-------|
| 1  | 69.4992  | 146 | 63.5  |
| 2  | 192.0676 | 180 | 78.3  |
| 3  | 253.1169 | 138 | 60.0  |
| 4  | 267.1291 | 196 | 85.2  |
| 5  | 275.1329 | 182 | 79.1  |
| 6  | 291.3352 | 154 | 67.0  |
| 7  | 308.2047 | 150 | 65.2  |
| 8  | 389.1749 | 230 | 100.0 |
| 9  | 495.4129 | 134 | 58.3  |
| 10 | 659.5080 | 134 | 58.3  |

## WPA:

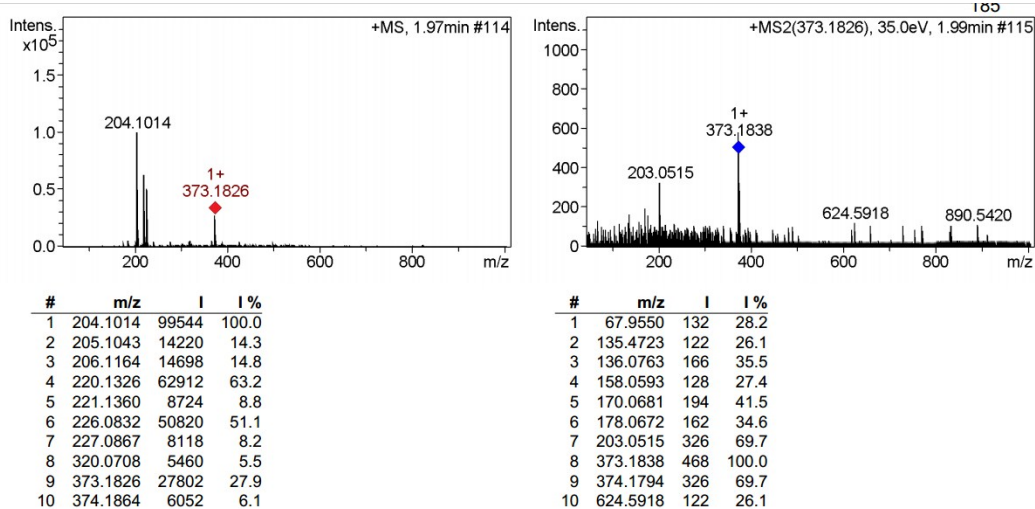

## MAK:

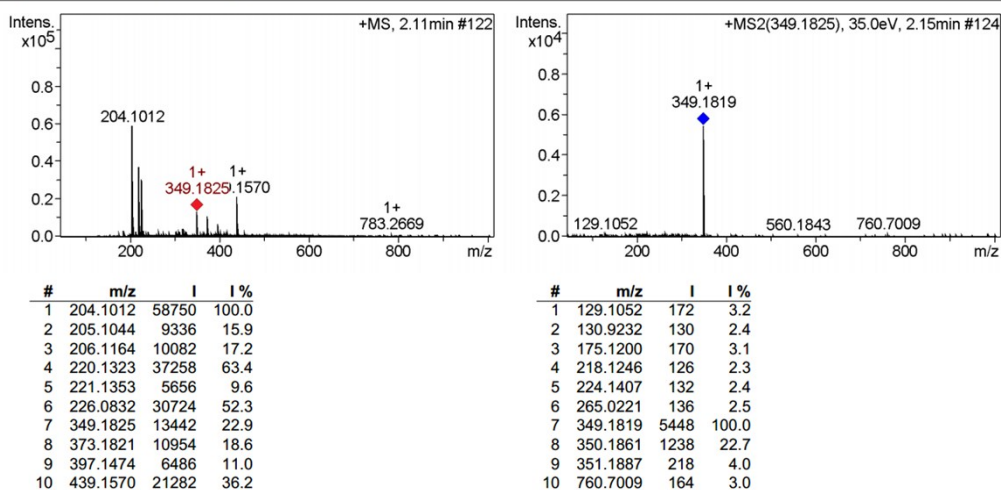

## RSS:

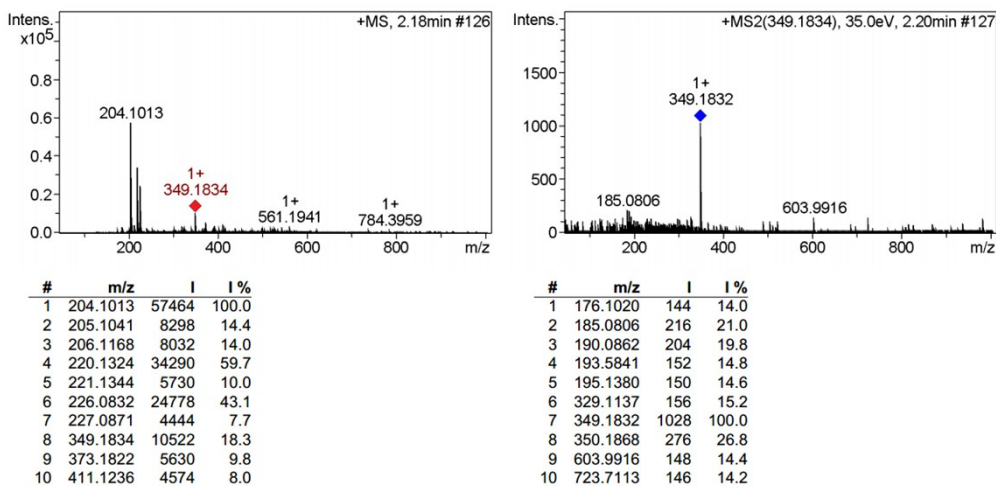

## WCC:

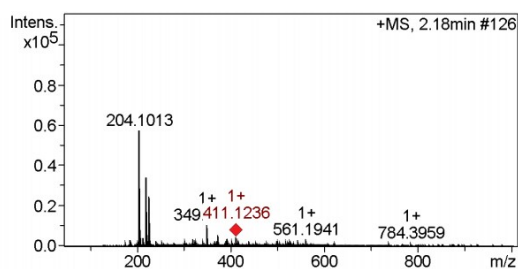

| #  | m/z      | I     | I %   |
|----|----------|-------|-------|
| 1  | 204.1013 | 57464 | 100.0 |
| 2  | 205.1041 | 8298  | 14.4  |
| 3  | 206.1168 | 8032  | 14.0  |
| 4  | 220.1324 | 34290 | 59.7  |
| 5  | 221.1344 | 5730  | 10.0  |
| 6  | 226.0832 | 24778 | 43.1  |
| 7  | 227.0871 | 4444  | 7.7   |
| 8  | 349.1834 | 10522 | 18.3  |
| 9  | 373.1822 | 5630  | 9.8   |
| 10 | 411.1236 | 4574  | 8.0   |

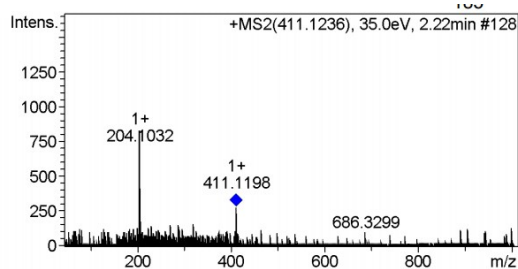

| #  | m/z      | I   | I %   |
|----|----------|-----|-------|
| 1  | 204.1032 | 718 | 100.0 |
| 2  | 205.1021 | 356 | 49.6  |
| 3  | 206.1186 | 182 | 25.3  |
| 4  | 230.1353 | 140 | 19.5  |
| 5  | 271.1170 | 150 | 20.9  |
| 6  | 287.1095 | 148 | 20.6  |
| 7  | 320.1173 | 156 | 21.7  |
| 8  | 411.1198 | 280 | 39.0  |
| 9  | 411.1727 | 134 | 18.7  |
| 10 | 412.1239 | 208 | 29.0  |

## PWA:

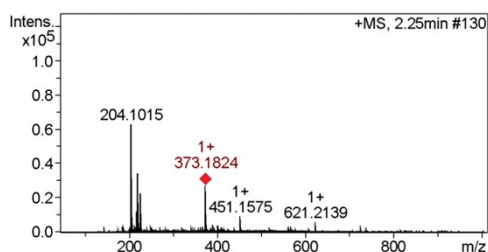

| #  | m/z      | I     | I %   |
|----|----------|-------|-------|
| 1  | 204.1015 | 63076 | 100.0 |
| 2  | 205.1044 | 9688  | 15.4  |
| 3  | 206.1167 | 9026  | 14.3  |
| 4  | 217.0964 | 12216 | 19.4  |
| 5  | 220.0959 | 7254  | 11.5  |
| 6  | 220.1324 | 34378 | 54.5  |
| 7  | 226.0833 | 23218 | 36.8  |
| 8  | 373.1824 | 27156 | 43.1  |
| 9  | 451.1575 | 9268  | 14.7  |
| 10 | 621.2139 | 5980  | 9.5   |

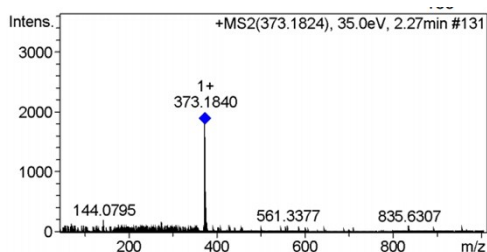

| #  | m/z      | I    | I %   |
|----|----------|------|-------|
| 1  | 56.7075  | 120  | 6.8   |
| 2  | 71.3476  | 140  | 7.9   |
| 3  | 144.0795 | 212  | 11.9  |
| 4  | 176.8644 | 124  | 7.0   |
| 5  | 275.0913 | 178  | 10.0  |
| 6  | 341.0998 | 120  | 6.8   |
| 7  | 373.1840 | 1776 | 100.0 |
| 8  | 374.1881 | 464  | 26.1  |
| 9  | 375.1908 | 204  | 11.5  |
| 10 | 377.1411 | 182  | 10.2  |

## NQCS:

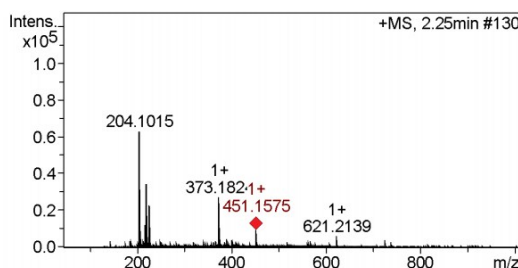

| #  | m/z      | I     | I %   |
|----|----------|-------|-------|
| 1  | 204.1015 | 63076 | 100.0 |
| 2  | 205.1044 | 9688  | 15.4  |
| 3  | 206.1167 | 9026  | 14.3  |
| 4  | 217.0964 | 12216 | 19.4  |
| 5  | 220.0959 | 7254  | 11.5  |
| 6  | 220.1324 | 34378 | 54.5  |
| 7  | 226.0833 | 23218 | 36.8  |
| 8  | 373.1824 | 27156 | 43.1  |
| 9  | 451.1575 | 9268  | 14.7  |
| 10 | 621.2139 | 5980  | 9.5   |

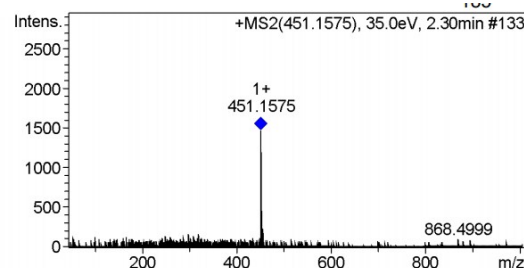

| #  | m/z      | I    | I %   |
|----|----------|------|-------|
| 1  | 167.1380 | 132  | 9.0   |
| 2  | 249.1185 | 136  | 9.3   |
| 3  | 299.1395 | 164  | 11.2  |
| 4  | 309.5139 | 142  | 9.7   |
| 5  | 319.1355 | 170  | 11.6  |
| 6  | 451.1575 | 1466 | 100.0 |
| 7  | 452.1649 | 538  | 36.7  |
| 8  | 453.1387 | 154  | 10.5  |
| 9  | 453.1798 | 180  | 12.3  |
| 10 | 455.1519 | 236  | 16.1  |

## ERLI:

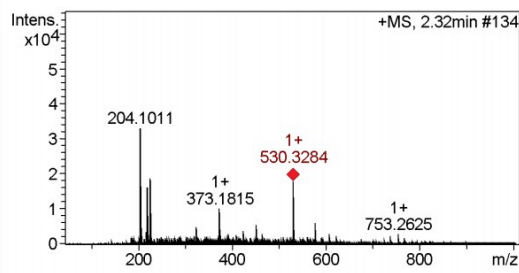

| #  | m/z      | I     | I %   |
|----|----------|-------|-------|
| 1  | 204.1011 | 33036 | 100.0 |
| 2  | 206.1169 | 4614  | 14.0  |
| 3  | 220.1324 | 16340 | 49.5  |
| 4  | 226.0834 | 18692 | 56.6  |
| 5  | 324.1048 | 5000  | 15.1  |
| 6  | 373.1815 | 10156 | 30.7  |
| 7  | 451.1568 | 5394  | 16.3  |
| 8  | 530.3284 | 17918 | 54.2  |
| 9  | 531.3312 | 5492  | 16.6  |
| 10 | 577.1883 | 6092  | 18.4  |

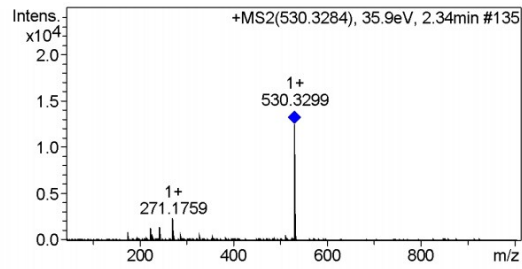

| #  | m/z      | I     | I %   |
|----|----------|-------|-------|
| 1  | 175.1193 | 880   | 7.1   |
| 2  | 225.1237 | 1308  | 10.5  |
| 3  | 243.1335 | 1430  | 11.5  |
| 4  | 271.1759 | 2352  | 18.9  |
| 5  | 272.1778 | 598   | 4.8   |
| 6  | 288.2026 | 478   | 3.8   |
| 7  | 512.3220 | 538   | 4.3   |
| 8  | 530.3299 | 12470 | 100.0 |
| 9  | 531.3321 | 4814  | 38.6  |
| 10 | 532.3344 | 700   | 5.6   |

## AVTF:

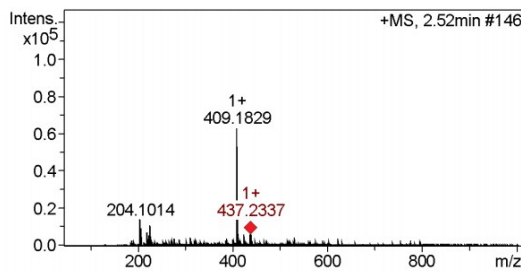

| #  | m/z      | I     | I %   |
|----|----------|-------|-------|
| 1  | 204.1014 | 14060 | 22.3  |
| 2  | 207.1375 | 9088  | 14.4  |
| 3  | 220.1322 | 7066  | 11.2  |
| 4  | 226.0826 | 10868 | 17.3  |
| 5  | 409.1829 | 62968 | 100.0 |
| 6  | 410.1863 | 16862 | 26.8  |
| 7  | 411.1961 | 7798  | 12.4  |
| 8  | 425.1510 | 5922  | 9.4   |
| 9  | 437.2337 | 5882  | 9.3   |
| 10 | 439.1574 | 7168  | 11.4  |

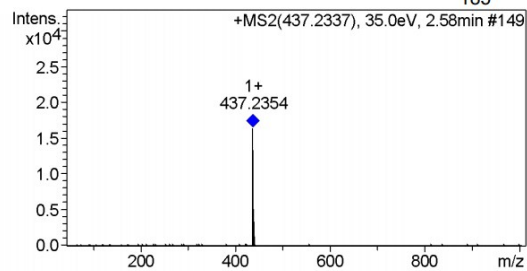

| #  | m/z      | I     | I %   |
|----|----------|-------|-------|
| 1  | 135.0788 | 150   | 0.9   |
| 2  | 319.7529 | 156   | 1.0   |
| 3  | 323.1278 | 172   | 1.1   |
| 4  | 380.9840 | 152   | 0.9   |
| 5  | 437.1456 | 284   | 1.7   |
| 6  | 437.2354 | 16380 | 100.0 |
| 7  | 438.2379 | 4172  | 25.5  |
| 8  | 439.1665 | 158   | 1.0   |
| 9  | 439.2416 | 684   | 4.2   |
| 10 | 440.2371 | 154   | 0.9   |

## TGPH:

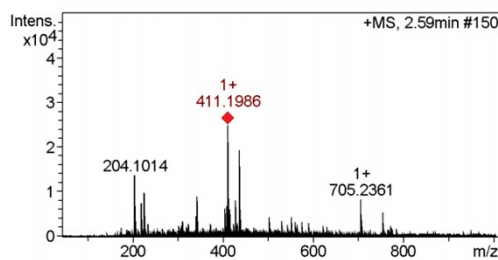

| #  | m/z      | I     | I %   |
|----|----------|-------|-------|
| 1  | 204.1014 | 13750 | 55.2  |
| 2  | 220.1329 | 7540  | 30.2  |
| 3  | 226.0831 | 9836  | 39.5  |
| 4  | 343.1288 | 9070  | 36.4  |
| 5  | 405.1718 | 6332  | 25.4  |
| 6  | 409.1822 | 6896  | 27.7  |
| 7  | 411.1986 | 24928 | 100.0 |
| 8  | 429.1138 | 8278  | 33.2  |
| 9  | 437.2348 | 19326 | 77.5  |
| 10 | 705.2361 | 8300  | 33.3  |

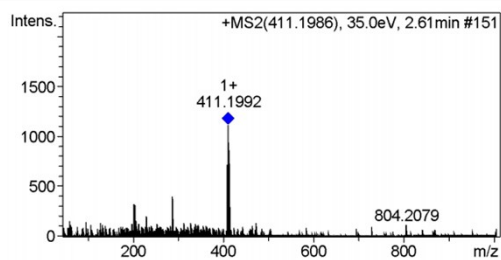

| #  | m/z      | I    | I %   |
|----|----------|------|-------|
| 1  | 203.0518 | 330  | 29.7  |
| 2  | 204.1016 | 314  | 28.2  |
| 3  | 206.1188 | 160  | 14.4  |
| 4  | 231.1314 | 208  | 18.7  |
| 5  | 287.0496 | 406  | 36.5  |
| 6  | 409.1840 | 720  | 64.7  |
| 7  | 410.1825 | 170  | 15.3  |
| 8  | 411.1992 | 1112 | 100.0 |
| 9  | 412.2011 | 518  | 46.6  |
| 10 | 413.2159 | 862  | 77.5  |



FLTT:

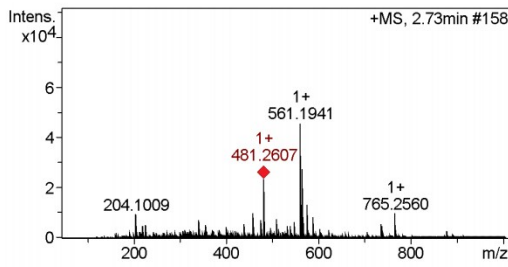

| #  | m/z      | I     | I%    |
|----|----------|-------|-------|
| 1  | 204.1009 | 9384  | 20.6  |
| 2  | 459.2802 | 9770  | 21.4  |
| 3  | 481.2607 | 23424 | 51.4  |
| 4  | 561.1941 | 45578 | 100.0 |
| 5  | 562.1959 | 13522 | 29.7  |
| 6  | 565.1548 | 27352 | 60.0  |
| 7  | 566.1581 | 8198  | 18.0  |
| 8  | 575.1727 | 13394 | 29.4  |
| 9  | 587.1368 | 8460  | 18.6  |
| 10 | 765.2560 | 9754  | 21.4  |

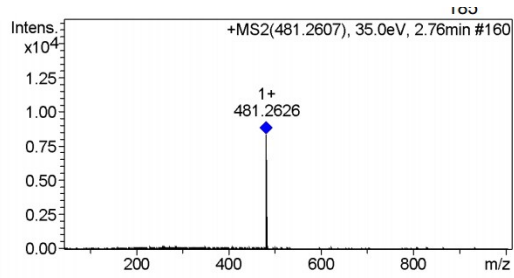

| #  | m/z      | I    | I%    |
|----|----------|------|-------|
| 1  | 263.1193 | 150  | 1.8   |
| 2  | 289.0192 | 148  | 1.8   |
| 3  | 350.0935 | 152  | 1.8   |
| 4  | 481.2626 | 8302 | 100.0 |
| 5  | 482.1680 | 176  | 2.1   |
| 6  | 482.2657 | 2216 | 26.7  |
| 7  | 482.3118 | 150  | 1.8   |
| 8  | 483.2673 | 290  | 3.5   |
| 9  | 483.3094 | 160  | 1.9   |
| 10 | 499.7545 | 148  | 1.8   |

REHK:

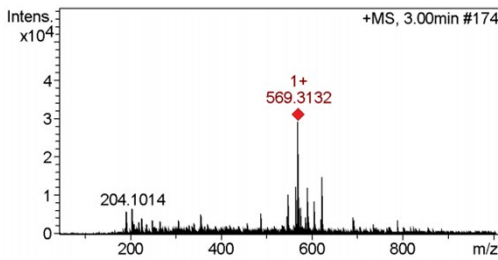

| #  | m/z      | I     | I%    |
|----|----------|-------|-------|
| 1  | 193.0858 | 5840  | 20.0  |
| 2  | 204.1014 | 6482  | 22.2  |
| 3  | 547.3315 | 10362 | 35.5  |
| 4  | 564.3590 | 12408 | 42.5  |
| 5  | 569.3132 | 29208 | 100.0 |
| 6  | 570.3183 | 9594  | 32.8  |
| 7  | 575.2080 | 6238  | 21.4  |
| 8  | 591.2041 | 12072 | 41.3  |
| 9  | 605.2206 | 8646  | 29.6  |
| 10 | 621.2153 | 14804 | 50.7  |

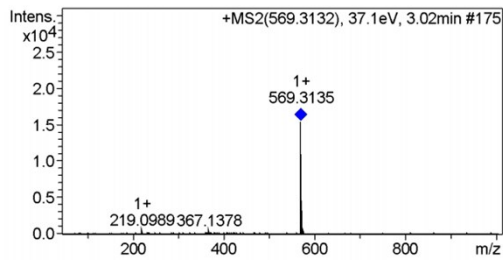

| #  | m/z      | I     | I%    |
|----|----------|-------|-------|
| 1  | 180.2682 | 196   | 1.3   |
| 2  | 219.0989 | 568   | 3.7   |
| 3  | 220.1070 | 212   | 1.4   |
| 4  | 367.1378 | 512   | 3.3   |
| 5  | 569.3135 | 15448 | 100.0 |
| 6  | 569.4116 | 224   | 1.5   |
| 7  | 570.3202 | 4740  | 30.7  |
| 8  | 571.3213 | 1208  | 7.8   |
| 9  | 575.2085 | 472   | 3.1   |
| 10 | 667.3662 | 194   | 1.3   |

DDYY:

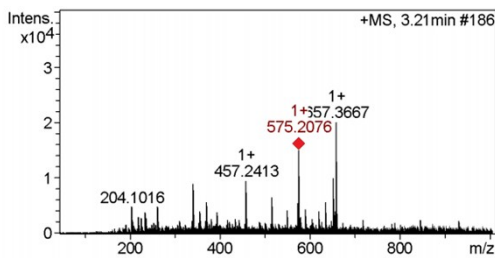

| #  | m/z      | I     | I%    |
|----|----------|-------|-------|
| 1  | 340.1779 | 9052  | 45.0  |
| 2  | 341.1368 | 5600  | 27.9  |
| 3  | 371.1484 | 5684  | 28.3  |
| 4  | 457.2413 | 9588  | 47.7  |
| 5  | 515.2090 | 6586  | 32.8  |
| 6  | 573.1937 | 5618  | 28.0  |
| 7  | 575.2076 | 15044 | 74.9  |
| 8  | 652.4111 | 10098 | 50.2  |
| 9  | 657.3667 | 20096 | 100.0 |
| 10 | 658.3694 | 5636  | 28.0  |

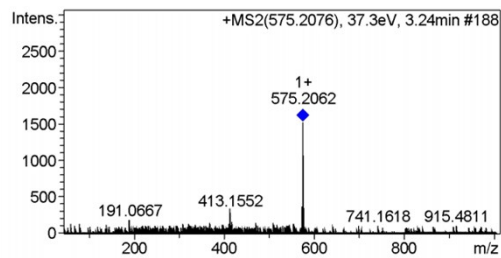

| #  | m/z      | I    | I%    |
|----|----------|------|-------|
| 1  | 191.0667 | 182  | 12.0  |
| 2  | 413.1552 | 318  | 20.9  |
| 3  | 417.1291 | 164  | 10.8  |
| 4  | 471.9499 | 146  | 9.6   |
| 5  | 510.2667 | 150  | 9.9   |
| 6  | 573.2074 | 372  | 24.4  |
| 7  | 573.2871 | 170  | 11.2  |
| 8  | 575.2062 | 1522 | 100.0 |
| 9  | 575.2627 | 254  | 16.7  |
| 10 | 576.2188 | 592  | 38.9  |

## ERRH:

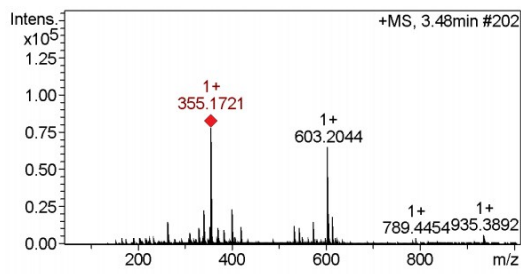

| #  | m/z      | I     | I%    |
|----|----------|-------|-------|
| 1  | 265.1057 | 15066 | 19.4  |
| 2  | 341.1377 | 22686 | 29.2  |
| 3  | 355.1721 | 77686 | 100.0 |
| 4  | 356.1754 | 14086 | 18.1  |
| 5  | 401.1591 | 23772 | 30.6  |
| 6  | 533.2021 | 12390 | 15.9  |
| 7  | 573.1945 | 15062 | 19.4  |
| 8  | 603.2044 | 65154 | 83.9  |
| 9  | 604.2079 | 20536 | 26.4  |
| 10 | 613.2108 | 18410 | 23.7  |

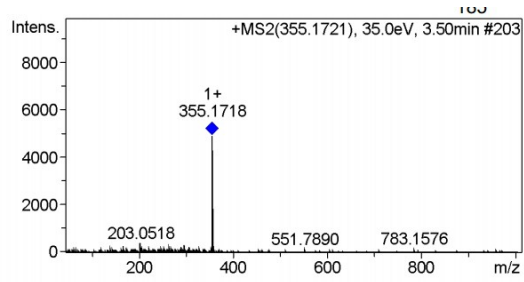

| #  | m/z      | I    | I%    |
|----|----------|------|-------|
| 1  | 138.3917 | 162  | 3.3   |
| 2  | 167.0732 | 268  | 5.5   |
| 3  | 203.0518 | 372  | 7.6   |
| 4  | 264.0745 | 160  | 3.3   |
| 5  | 289.0885 | 218  | 4.4   |
| 6  | 296.9004 | 300  | 6.1   |
| 7  | 306.0915 | 202  | 4.1   |
| 8  | 355.1718 | 4902 | 100.0 |
| 9  | 356.1766 | 926  | 18.9  |
| 10 | 357.1778 | 300  | 6.1   |

## NRCC:

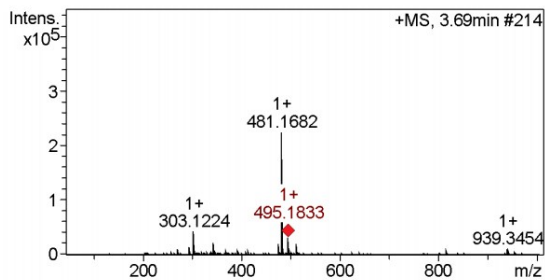

| #  | m/z      | I      | I%    |
|----|----------|--------|-------|
| 1  | 295.1023 | 14078  | 6.3   |
| 2  | 303.1224 | 41928  | 18.7  |
| 3  | 343.1150 | 21896  | 9.8   |
| 4  | 476.2123 | 19098  | 8.5   |
| 5  | 481.1682 | 224304 | 100.0 |
| 6  | 482.1712 | 51324  | 22.9  |
| 7  | 483.1710 | 13220  | 5.9   |
| 8  | 495.1833 | 30998  | 13.8  |
| 9  | 497.1447 | 12752  | 5.7   |
| 10 | 511.1782 | 20322  | 9.1   |

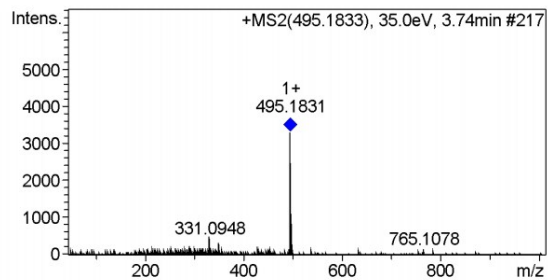

| #  | m/z      | I    | I%    |
|----|----------|------|-------|
| 1  | 272.0512 | 152  | 4.6   |
| 2  | 317.0830 | 176  | 5.3   |
| 3  | 331.0860 | 414  | 12.6  |
| 4  | 331.0948 | 430  | 13.0  |
| 5  | 349.1286 | 308  | 9.3   |
| 6  | 350.1351 | 244  | 7.4   |
| 7  | 495.1831 | 3296 | 100.0 |
| 8  | 496.1871 | 1098 | 33.3  |
| 9  | 497.1663 | 240  | 7.3   |
| 10 | 498.1601 | 178  | 5.4   |

## MGDG:

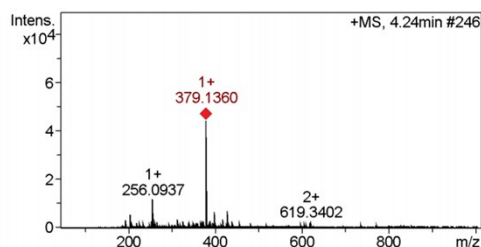

| #  | m/z      | I     | I%    |
|----|----------|-------|-------|
| 1  | 195.1004 | 3184  | 7.2   |
| 2  | 204.1011 | 5566  | 12.6  |
| 3  | 256.0937 | 11962 | 27.0  |
| 4  | 257.9669 | 3750  | 8.5   |
| 5  | 313.0900 | 3364  | 7.6   |
| 6  | 379.1360 | 44274 | 100.0 |
| 7  | 380.1391 | 8216  | 18.6  |
| 8  | 399.1228 | 6622  | 15.0  |
| 9  | 417.1539 | 3614  | 8.2   |
| 10 | 429.1509 | 7090  | 16.0  |

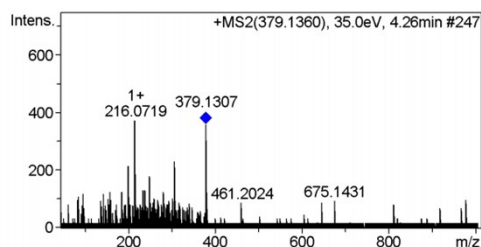

| #  | m/z      | I   | I%    |
|----|----------|-----|-------|
| 1  | 95.4008  | 120 | 32.3  |
| 2  | 158.0930 | 124 | 33.3  |
| 3  | 185.0385 | 124 | 33.3  |
| 4  | 201.0531 | 216 | 58.1  |
| 5  | 216.0719 | 372 | 100.0 |
| 6  | 234.0864 | 132 | 35.5  |
| 7  | 239.0892 | 132 | 35.5  |
| 8  | 249.1013 | 180 | 48.4  |
| 9  | 308.0834 | 230 | 61.8  |
| 10 | 379.1307 | 358 | 96.2  |

## AKRG:

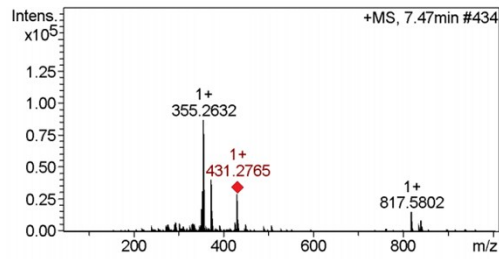

| #  | m/z      | I     | I %   |
|----|----------|-------|-------|
| 1  | 351.2145 | 17044 | 19.7  |
| 2  | 353.2295 | 31568 | 36.4  |
| 3  | 355.2632 | 86690 | 100.0 |
| 4  | 356.2663 | 23470 | 27.1  |
| 5  | 373.2736 | 41684 | 48.1  |
| 6  | 374.2777 | 11112 | 12.8  |
| 7  | 431.2765 | 29162 | 33.6  |
| 8  | 817.5802 | 15106 | 17.4  |
| 9  | 818.5853 | 8272  | 9.5   |
| 10 | 839.5655 | 8300  | 9.6   |

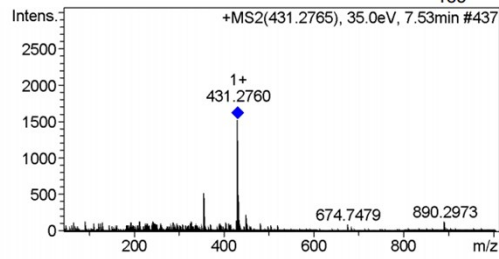

| #  | m/z      | I    | I %   |
|----|----------|------|-------|
| 1  | 92.2857  | 138  | 9.1   |
| 2  | 214.1681 | 134  | 8.8   |
| 3  | 355.2697 | 158  | 10.4  |
| 4  | 356.2654 | 530  | 34.8  |
| 5  | 429.3182 | 142  | 9.3   |
| 6  | 430.3143 | 210  | 13.8  |
| 7  | 431.2760 | 1524 | 100.0 |
| 8  | 432.2807 | 500  | 32.8  |
| 9  | 433.2835 | 136  | 8.9   |
| 10 | 449.2852 | 224  | 14.7  |

## AMMG:

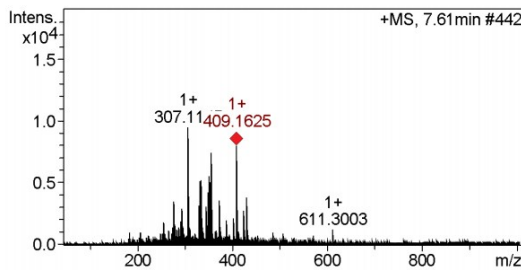

| #  | m/z      | I    | I %   |
|----|----------|------|-------|
| 1  | 307.1145 | 9498 | 100.0 |
| 2  | 333.2037 | 5120 | 53.9  |
| 3  | 335.2192 | 5262 | 55.4  |
| 4  | 349.1976 | 4236 | 44.6  |
| 5  | 351.2126 | 5578 | 58.7  |
| 6  | 353.2299 | 5108 | 53.8  |
| 7  | 355.2626 | 7404 | 78.0  |
| 8  | 373.2732 | 3612 | 38.0  |
| 9  | 409.1625 | 7984 | 84.1  |
| 10 | 431.2764 | 3886 | 40.9  |

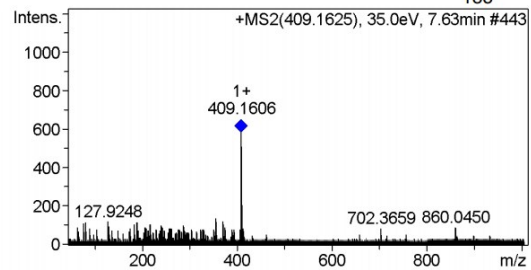

| #  | m/z      | I   | I %   |
|----|----------|-----|-------|
| 1  | 77.1992  | 112 | 19.4  |
| 2  | 81.4190  | 116 | 20.1  |
| 3  | 127.9248 | 124 | 21.5  |
| 4  | 183.0874 | 106 | 18.3  |
| 5  | 189.1377 | 116 | 20.1  |
| 6  | 217.0929 | 104 | 18.0  |
| 7  | 355.2654 | 138 | 23.9  |
| 8  | 371.1879 | 122 | 21.1  |
| 9  | 409.1606 | 578 | 100.0 |
| 10 | 409.2563 | 120 | 20.8  |

## MLCA:

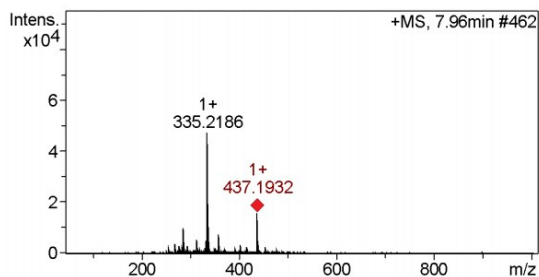

| #  | m/z      | I     | I %   |
|----|----------|-------|-------|
| 1  | 268.2631 | 3956  | 8.4   |
| 2  | 286.1223 | 9924  | 21.0  |
| 3  | 313.1042 | 5564  | 11.8  |
| 4  | 333.2037 | 4976  | 10.5  |
| 5  | 335.2186 | 47346 | 100.0 |
| 6  | 336.2225 | 11340 | 24.0  |
| 7  | 337.2348 | 7822  | 16.5  |
| 8  | 357.2009 | 7502  | 15.8  |
| 9  | 437.1932 | 16060 | 33.9  |
| 10 | 438.1971 | 4010  | 8.5   |

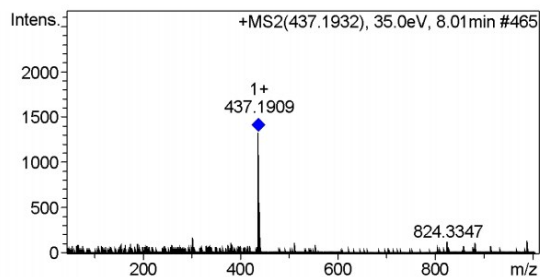

| #  | m/z      | I    | I %   |
|----|----------|------|-------|
| 1  | 303.1253 | 140  | 10.5  |
| 2  | 381.2638 | 114  | 8.6   |
| 3  | 437.1909 | 1330 | 100.0 |
| 4  | 437.2694 | 138  | 10.4  |
| 5  | 438.2009 | 564  | 42.4  |
| 6  | 439.2031 | 182  | 13.7  |
| 7  | 510.6721 | 114  | 8.6   |
| 8  | 824.3347 | 126  | 9.5   |
| 9  | 882.5862 | 120  | 9.0   |
| 10 | 988.3883 | 138  | 10.4  |
